# Supplementary material
Source: publisher figshare collection journal article supplement (https://springernature.figshare.com/ndownloader/files/14208080)
Supplement: Supplementary file 1 [file 14208080]

Supplementary Information

for

**Incorporation of Cu3BTC2 nanocrystals to increase the permeability of polymeric membranes in O2/N2 separation**

Chong Yang Chuah[a], Tae-Hyun Bae*[a,b]

[a] School of Chemical and Biomedical Engineering, Nanyang Technological University, Singapore 637459, Singapore

[b] Singapore Membrane Technology Centre, Nanyang Environment and Water Research Institute, Nanyang Technological University, Singapore 637141, Singapore

* Corresponding author

Email: cchuah002@e.ntu.edu.sg, thbae@ntu.edu.sg


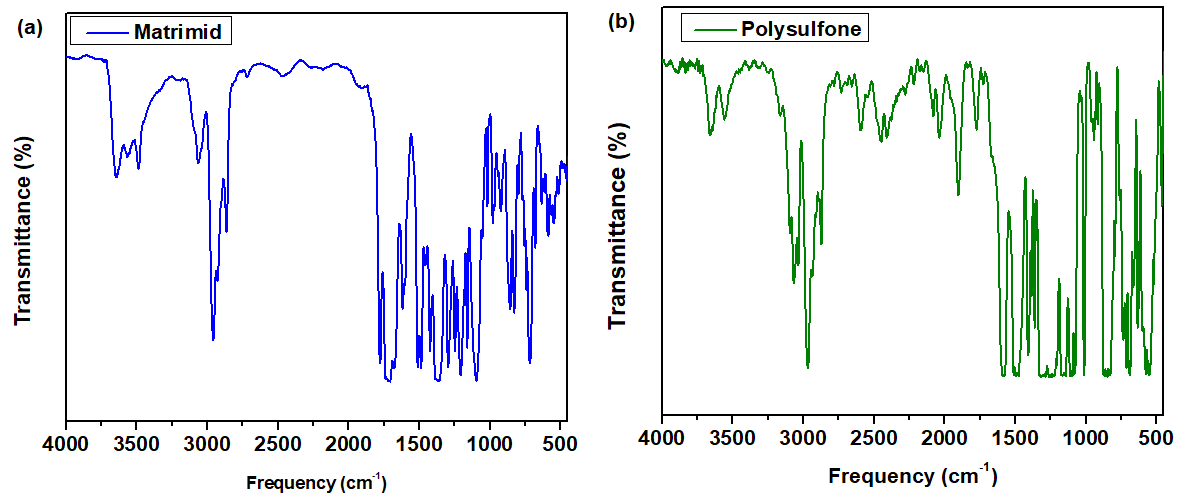


**Figure S1** FTIR spectrum of **(a)** Matrimid 5218 and **(b)** Polysulfone Udel polymer


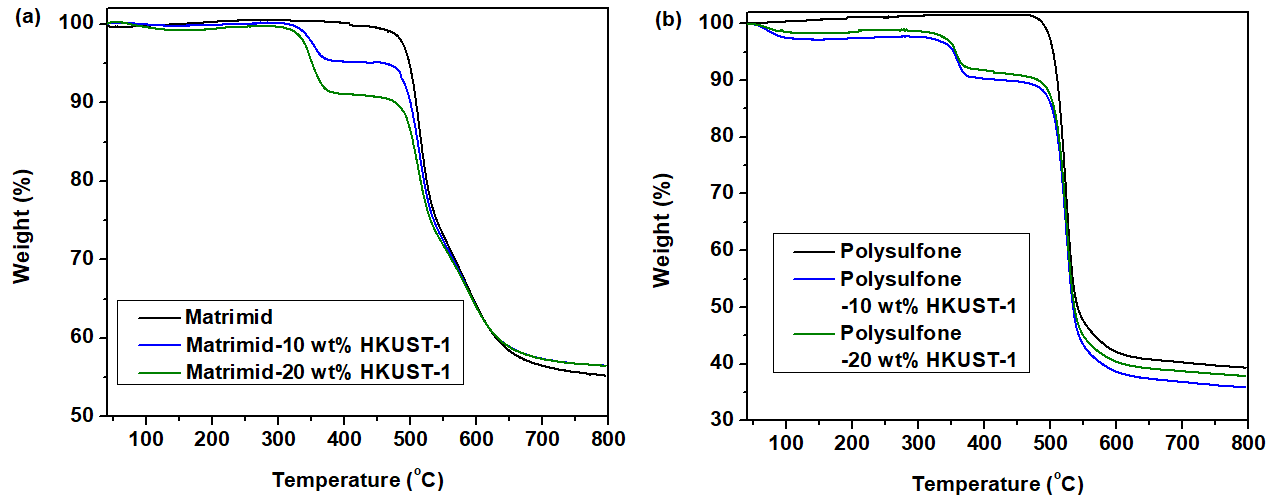


**Figure S2** TGA curves of **(a)** Matrimid and **(b)** polysulfone membranes containing

10 wt% and 20 wt% Cu3BTC2 nanocrystals


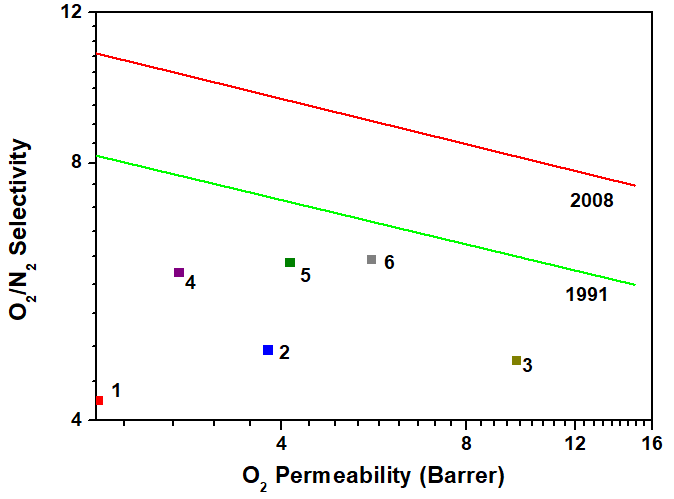


**Figure S3** Comparison of the performance of the studied polymer with the Robeson Upper Bound. The label “1” to “6” is indicated in Table below.

| **Membrane** | **Label** |
| --- | --- |
| **Polysulfone** | 1 |
| **Polysulfone + 10 wt% Cu3BTC2** | 2 |
| **Polysulfone + 20 wt% Cu3BTC2** | 3 |
| **Matrimid®** | 4 |
| **Matrimid® + 10 wt% Cu3BTC2** | 5 |
| **Matrimid® + 20 wt% Cu3BTC2** | 6 |
